# Supplementary material for: Identification of Hub Genes Related to Alzheimer’s Disease and Major Depressive Disorder
Source: PubMed Central journal article supplement — Am J Alzheimers Dis Other Demen. 2021 Nov 3;36:15333175211046123. doi: 10.1177/15333175211046123 (PMC10695082; doi:10.1177/15333175211046123), 2021-11-03
Supplement: sj-pdf-1-aja-10.1177_15333175211046123.pdf [file sj-pdf-1-aja-10.1177_15333175211046123.pdf]

**Online Supplemental materials for:**

**Identification of Hub Genes Related to Alzheimer's Disease and Major Depressive Disorder**

Yajing Cheng, MS<sup>1</sup>, Meiyue Sun, MS<sup>1</sup>, Xin Geng, PhD<sup>2,3,4</sup>, and Fei Wang \*, PhD<sup>1</sup>

<sup>1</sup>Department of Neurology, General Hospital, Tianjin Medical University, Tianjin, China; <sup>2</sup>Department of Biochemistry and Molecular Biology, School of Basic Medical Sciences, Tianjin Medical University, Tianjin, China; <sup>3</sup>Tianjin Key Laboratory of Cellular and Molecular Immunology, Key Laboratory of Immune Microenvironment and Disease of Ministry of Education, Tianjin Medical University, Tianjin, China; <sup>4</sup>Tianjin Key Laboratory of Medical Epigenetics, School of Basic Medical Sciences, Tianjin Medical University, Tianjin, China.

Address correspondence to: Fei Wang, MD & PhD, Department of Neurology, General Hospital, Tianjin Medical University, Tianjin, China. E-mail: [feiwang@tmu.edu.cn](mailto:feiwang@tmu.edu.cn)

## Online Supplemental Figure S1

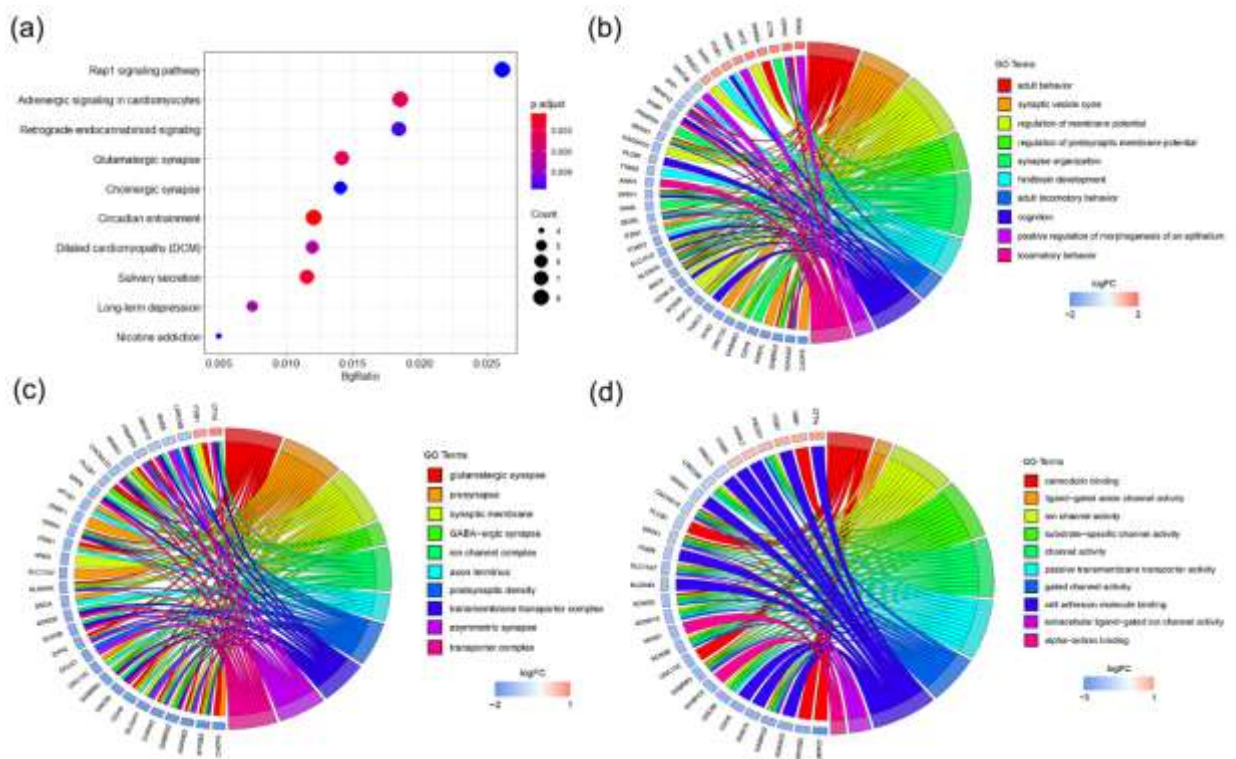

**Figure S1.** Functional characteristics analysis for DEGs of AD-related datasets. (a) KEGG pathway enrichment analyses. (b) The BP category of GO enrichment analyses. (c) The CC category of GO enrichment analyses. (d) The MF category of GO enrichment analyses.

### Online Supplemental Figure S2

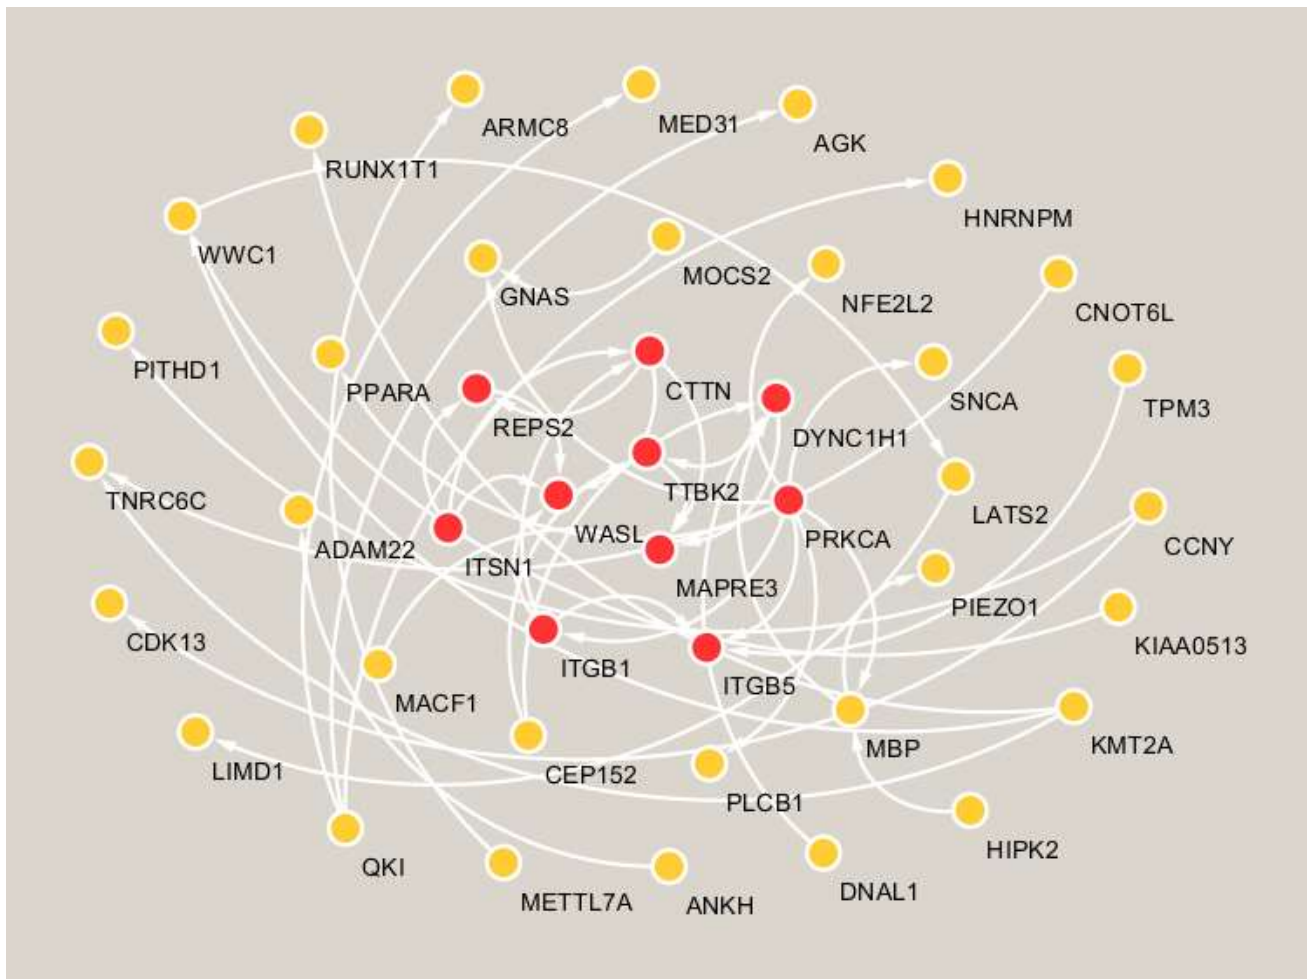

**Figure S2.** Establishment of the protein- protein interaction network. Nine hub genes are shown in red.

**Table S1** Significant top 10 enrichments of KEGG pathways of 171 DEGs of AD-related datasets.

| <b>ID</b> | <b>Description</b>                     | <b>Term Candidate Gene Num</b> | <b>Total Candidate Gene Num</b> | <b>Term Gene Num</b> | <b>Total Gene Num</b> | <b>Rich Ratio*</b> | <b>p.value</b> | <b>p.adjust</b> | <b>q.value</b> |
|-----------|----------------------------------------|--------------------------------|---------------------------------|----------------------|-----------------------|--------------------|----------------|-----------------|----------------|
| hsa04713  | Circadian entrainment                  | 8                              | 73                              | 97                   | 8041                  | 0.109589           | 2.36E-06       | 0.000494        | 0.000358       |
| hsa04970  | Salivary secretion                     | 7                              | 73                              | 91                   | 8041                  | 0.09589            | 1.67E-05       | 0.001748        | 0.001268       |
| hsa04261  | Adrenergic signaling in cardiomyocytes | 8                              | 73                              | 149                  | 8041                  | 0.109589           | 5.59E-05       | 0.003765        | 0.002731       |
| hsa04724  | Glutamatergic synapse                  | 7                              | 73                              | 114                  | 8041                  | 0.09589            | 7.21E-05       | 0.003765        | 0.002731       |
| hsa04730  | Long-term depression                   | 5                              | 73                              | 60                   | 8041                  | 0.068493           | 0.000199       | 0.007703        | 0.005587       |
| hsa05414  | Dilated cardiomyopathy (DCM)           | 6                              | 73                              | 96                   | 8041                  | 0.082192           | 0.000221       | 0.007703        | 0.005587       |
| hsa04723  | Retrograde endocannabinoid signaling   | 7                              | 73                              | 148                  | 8041                  | 0.09589            | 0.000366       | 0.010939        | 0.007934       |
| hsa05033  | Nicotine addiction                     | 4                              | 73                              | 40                   | 8041                  | 0.054795           | 0.000446       | 0.011423        | 0.008285       |
| hsa04725  | Cholinergic synapse                    | 6                              | 73                              | 113                  | 8041                  | 0.082192           | 0.000534       | 0.011423        | 0.008285       |
| hsa04015  | Rap1 signaling pathway                 | 8                              | 73                              | 210                  | 8041                  | 0.109589           | 0.000592       | 0.011423        | 0.008285       |

\* The rich ratio is the ratio of the value of "Term Candidate Gene Num" to the value of " Total Candidate Gene Num ". It means that the higher the rich ratio's value of the pathway, the greater the correlation between the pathway and AD.

**Table S2** Significant top 10 of GO enrichment analyses of 171 DEGs of AD-related datasets.

| ID        | Description | Term Candidate Gene Num                               | Total Candidate Gene Num | Term Gene Num | Total Gene Num | Rich Ratio* | p.value     |             |
|-----------|-------------|-------------------------------------------------------|--------------------------|---------------|----------------|-------------|-------------|-------------|
|           | GO:0030534  | adult behavior                                        | 10                       | 148           | 144            | 18670       | 0.067567568 | 2.24E-07    |
|           | GO:0099504  | synaptic vesicle cycle                                | 10                       | 148           | 194            | 18670       | 0.067567568 | 3.42E-06    |
|           | GO:0042391  | regulation of membrane potential                      | 14                       | 148           | 434            | 18670       | 0.094594595 | 9.45E-06    |
|           | GO:0060078  | regulation of postsynaptic membrane potential         | 8                        | 148           | 140            | 18670       | 0.054054054 | 1.59E-05    |
| <b>BP</b> | GO:0050808  | synapse organization                                  | 13                       | 148           | 408            | 18670       | 0.087837838 | 2.27E-05    |
|           | GO:0030902  | hindbrain development                                 | 8                        | 148           | 152            | 18670       | 0.054054054 | 2.89E-05    |
|           | GO:0008344  | adult locomotory behavior                             | 6                        | 148           | 77             | 18670       | 0.040540541 | 3.34E-05    |
|           | GO:0050890  | cognition                                             | 10                       | 148           | 296            | 18670       | 0.067567568 | 0.000128069 |
|           | GO:1905332  | positive regulation of morphogenesis of an epithelium | 4                        | 148           | 35             | 18670       | 0.027027027 | 0.000163979 |
|           | GO:0007626  | locomotory behavior                                   | 8                        | 148           | 198            | 18670       | 0.054054054 | 0.000184398 |
|           | GO:0098978  | glutamatergic synapse                                 | 13                       | 156           | 349            | 19717       | 0.083333333 | 4.29E-06    |
|           | GO:0098793  | presynapse                                            | 15                       | 156           | 491            | 19717       | 0.096153846 | 8.58E-06    |
|           | GO:0097060  | synaptic membrane                                     | 14                       | 156           | 432            | 19717       | 0.08974359  | 8.96E-06    |
|           | GO:0098982  | GABA-ergic synapse                                    | 6                        | 156           | 71             | 19717       | 0.038461538 | 2.09E-05    |
| <b>CC</b> | GO:0034702  | ion channel complex                                   | 11                       | 156           | 301            | 19717       | 0.070512821 | 2.86E-05    |
|           | GO:0043679  | axon terminus                                         | 7                        | 156           | 119            | 19717       | 0.044871795 | 4.53E-05    |
|           | GO:0014069  | postsynaptic density                                  | 11                       | 156           | 324            | 19717       | 0.070512821 | 5.58E-05    |
|           | GO:1902495  | transmembrane transporter complex                     | 11                       | 156           | 324            | 19717       | 0.070512821 | 5.58E-05    |
|           | GO:0032279  | asymmetric synapse                                    | 11                       | 156           | 328            | 19717       | 0.070512821 | 6.23E-05    |
|           | GO:1990351  | transporter complex                                   | 11                       | 156           | 332            | 19717       | 0.070512821 | 6.95E-05    |
| <b>MF</b> | GO:0005516  | calmodulin binding                                    | 8                        | 147           | 200            | 17697       | 0.054421769 | 0.000269809 |
|           | GO:0099095  | ligand-gated anion channel activity                   | 3                        | 147           | 20             | 17697       | 0.020408163 | 0.000577097 |
|           | GO:0005216  | ion channel activity                                  | 11                       | 147           | 416            | 17697       | 0.074829932 | 0.000718978 |

|            |                                                 |    |     |     |       |             |             |
|------------|-------------------------------------------------|----|-----|-----|-------|-------------|-------------|
| GO:0022838 | substrate-specific channel activity             | 11 | 147 | 428 | 17697 | 0.074829932 | 0.000906803 |
| GO:0015267 | channel activity                                | 11 | 147 | 456 | 17697 | 0.074829932 | 0.001507154 |
| GO:0022803 | passive transmembrane transporter activity      | 11 | 147 | 457 | 17697 | 0.074829932 | 0.001533502 |
| GO:0022836 | gated channel activity                          | 9  | 147 | 343 | 17697 | 0.06122449  | 0.002303175 |
| GO:0050839 | cell adhesion molecule binding                  | 11 | 147 | 499 | 17697 | 0.074829932 | 0.003033698 |
| GO:0005230 | extracellular ligand-gated ion channel activity | 4  | 147 | 75  | 17697 | 0.027210884 | 0.003518131 |
| GO:0051393 | alpha-actinin binding                           | 3  | 147 | 37  | 17697 | 0.020408163 | 0.00354801  |

\* The rich ratio is the ratio of the value of "Term Candidate Gene Num" to the value of " Total Candidate Gene Num ". It means that the higher the rich ratio's value of the GO term, the greater the correlation between the GO term and AD.

**Table S3** Significant top 10 enrichments of KEGG pathways of 79 DEGs shared by AD and MDD.

| <b>ID</b> | <b>Description</b>                                        | <b>Term Candidate Gene Num</b> | <b>Total Candidate Gene Num</b> | <b>Term Gene Num</b> | <b>Total Gene Num</b> | <b>Rich Ratio*</b> | <b>p.value</b> | <b>p.adjust</b> | <b>q.value</b> |
|-----------|-----------------------------------------------------------|--------------------------------|---------------------------------|----------------------|-----------------------|--------------------|----------------|-----------------|----------------|
| hsa04730  | Long-term depression                                      | 4                              | 33                              | 60                   | 8041                  | 0.121212           | 9.75E-05       | 0.014432        | 0.00924        |
| hsa04392  | Hippo signaling pathway - multiple species                | 3                              | 33                              | 26                   | 8041                  | 0.090909           | 0.000214       | 0.015359        | 0.00983        |
| hsa04540  | Gap junction                                              | 4                              | 33                              | 88                   | 8041                  | 0.121212           | 0.00043        | 0.015359        | 0.00983        |
| hsa04970  | Salivary secretion                                        | 4                              | 33                              | 91                   | 8041                  | 0.121212           | 0.000489       | 0.015359        | 0.00983        |
| hsa05414  | Dilated cardiomyopathy (DCM)                              | 4                              | 33                              | 96                   | 8041                  | 0.121212           | 0.000599       | 0.015359        | 0.00983        |
| hsa04713  | Circadian entrainment                                     | 4                              | 33                              | 97                   | 8041                  | 0.121212           | 0.000623       | 0.015359        | 0.00983        |
| hsa04961  | Endocrine and other factor-regulated calcium reabsorption | 3                              | 33                              | 53                   | 8041                  | 0.090909           | 0.001283       | 0.027126        | 0.01736        |
| hsa04611  | Platelet activation                                       | 4                              | 33                              | 124                  | 8041                  | 0.121212           | 0.00156        | 0.028854        | 0.01847        |
| hsa04270  | Vascular smooth muscle contraction                        | 4                              | 33                              | 132                  | 8041                  | 0.121212           | 0.001963       | 0.032281        | 0.02066        |
| hsa04924  | Renin secretion                                           | 3                              | 33                              | 69                   | 8041                  | 0.090909           | 0.002744       | 0.033403        | 0.02138        |

\* The rich ratio is the ratio of the value of "Term Candidate Gene Num" to the value of " Total Candidate Gene Num ". It means that the higher the rich ratio's value of the pathway, the greater the correlation between the pathway and AD and MDD.

**Table S4** Significant top 10 of GO enrichment analyses of 79 DEGs shared by AD and MDD.

|           | <b>ID</b>  | <b>Description</b>                        | <b>Term<br/>Candidate<br/>Gene Num</b> | <b>Total<br/>Candidate<br/>Gene Num</b> | <b>Term<br/>Gene Num</b> | <b>Total<br/>Gene Num</b> | <b>Rich*<br/>Ratio</b> | <b>pvalue</b> |
|-----------|------------|-------------------------------------------|----------------------------------------|-----------------------------------------|--------------------------|---------------------------|------------------------|---------------|
| <b>BP</b> | GO:0033962 | cytoplasmic mRNA processing body assembly | 3                                      | 68                                      | 21                       | 18670                     | 0.044118               | 5.86E-05      |
|           | GO:0007626 | locomotory behavior                       | 6                                      | 68                                      | 198                      | 18670                     | 0.088235               | 8.36E-05      |
|           | GO:0008344 | adult locomotory behavior                 | 4                                      | 68                                      | 77                       | 18670                     | 0.058824               | 0.000178      |
|           | GO:0030534 | adult behavior                            | 5                                      | 68                                      | 144                      | 18670                     | 0.073529               | 0.00018       |
|           | GO:0097581 | lamellipodium organization                | 4                                      | 68                                      | 82                       | 18670                     | 0.058824               | 0.000227      |
|           | GO:0035329 | hippo signaling                           | 3                                      | 68                                      | 38                       | 18670                     | 0.044118               | 0.000356      |
|           | GO:1904526 | regulation of microtubule binding         | 2                                      | 68                                      | 10                       | 18670                     | 0.029412               | 0.000577      |
|           | GO:0061013 | regulation of mRNA catabolic process      | 5                                      | 68                                      | 199                      | 18670                     | 0.073529               | 0.000791      |
|           | GO:0035330 | regulation of hippo signaling             | 2                                      | 68                                      | 12                       | 18670                     | 0.029412               | 0.000843      |
|           | GO:1901215 | negative regulation of neuron death       | 5                                      | 68                                      | 208                      | 18670                     | 0.073529               | 0.000965      |
| <b>CC</b> | GO:0030027 | lamellipodium                             | 6                                      | 73                                      | 193                      | 19717                     | 0.082192               | 8.04E-05      |
|           | GO:0031252 | cell leading edge                         | 7                                      | 73                                      | 403                      | 19717                     | 0.09589                | 0.000723      |
|           | GO:0016607 | nuclear speck                             | 6                                      | 73                                      | 397                      | 19717                     | 0.082192               | 0.00351       |
|           | GO:0008076 | voltage-gated potassium channel complex   | 3                                      | 73                                      | 87                       | 19717                     | 0.041096               | 0.004131      |
|           | GO:0030139 | endocytic vesicle                         | 5                                      | 73                                      | 303                      | 19717                     | 0.068493               | 0.005314      |
|           | GO:0034705 | potassium channel complex                 | 3                                      | 73                                      | 96                       | 19717                     | 0.041096               | 0.005438      |
|           | GO:0005938 | cell cortex                               | 5                                      | 73                                      | 308                      | 19717                     | 0.068493               | 0.005689      |
|           | GO:0008305 | integrin complex                          | 2                                      | 73                                      | 31                       | 19717                     | 0.027397               | 0.005865      |
|           | GO:0019867 | outer membrane                            | 4                                      | 73                                      | 203                      | 19717                     | 0.054795               | 0.006827      |
|           | GO:0051233 | spindle midzone                           | 2                                      | 73                                      | 34                       | 19717                     | 0.027397               | 0.007026      |
| <b>MF</b> | GO:0005178 | integrin binding                          | 4                                      | 67                                      | 132                      | 17697                     | 0.059701               | 0.001576      |
|           | GO:0051010 | microtubule plus-end binding              | 2                                      | 67                                      | 17                       | 17697                     | 0.029851               | 0.001851      |
|           | GO:0051959 | dynein light intermediate chain binding   | 2                                      | 67                                      | 29                       | 17697                     | 0.029851               | 0.005367      |
|           | GO:0003779 | actin binding                             | 6                                      | 67                                      | 431                      | 17697                     | 0.089552               | 0.00575       |



|            |                                    |   |    |     |       |          |          |
|------------|------------------------------------|---|----|-----|-------|----------|----------|
| GO:0003713 | transcription coactivator activity | 5 | 67 | 319 | 17697 | 0.074627 | 0.007157 |
| GO:0043014 | alpha-tubulin binding              | 2 | 67 | 37  | 17697 | 0.029851 | 0.008634 |
| GO:0015631 | tubulin binding                    | 5 | 67 | 336 | 17697 | 0.074627 | 0.008849 |
| GO:0019894 | kinesin binding                    | 2 | 67 | 42  | 17697 | 0.029851 | 0.011027 |
| GO:0001221 | transcription cofactor binding     | 2 | 67 | 43  | 17697 | 0.029851 | 0.011537 |
| GO:0048156 | tau protein binding                | 2 | 67 | 45  | 17697 | 0.029851 | 0.012588 |

---

\* The rich ratio is the ratio of the value of "Term Candidate Gene Num" to the value of " Total Candidate Gene Num ". It means that the higher the rich ratio's value of the GO term, the greater the correlation between the GO term and AD and MDD.

**Table S5** The top 10 of Degree, MNC, DMNC, MCC using the CytoHubba plugin

| Degree      |       | MNC         |       | DMNC        |         | MCC         |       |
|-------------|-------|-------------|-------|-------------|---------|-------------|-------|
| Gene Symbol | score | Gene Symbol | score | Gene Symbol | score   | Gene Symbol | score |
| PRKCA       | 8     | WASL        | 4     | REPS2       | 0.46346 | CTTN        | 9     |
| DYNC1H1     | 5     | CTTN        | 4     | ITSN1       | 0.46346 | PRKCA       | 8     |
| CTTN        | 5     | REPS2       | 3     | WASL        | 0.37893 | WASL        | 8     |
| MAPRE3      | 4     | DYNC1H1     | 3     | CTTN        | 0.37893 | REPS2       | 6     |
| ITGB1       | 4     | TTBK2       | 3     | DYNC1H1     | 0.30898 | DYNC1H1     | 6     |
| WASL        | 4     | ITSN1       | 3     | TTBK2       | 0.30898 | ITSN1       | 6     |
| ITSN1       | 3     | MAPRE3      | 2     | MAPRE3      | 0.30779 | MBP         | 4     |
| ITGB5       | 3     | ITGB5       | 2     | ITGB5       | 0.30779 | MAPRE3      | 4     |
| REPS2       | 3     | ITGB1       | 2     | ITGB1       | 0.30779 | ITGB1       | 4     |
| TTBK2       | 3     | PRKCA       | 2     | PRKCA       | 0.30779 | TTBK2       | 4     |
| KMT2A       | 3     | CEP152      | 2     | CEP152      | 0.30779 |             |       |
| WWC1        | 3     |             |       |             |         |             |       |
| QKI         | 3     |             |       |             |         |             |       |

**Abbreviations:** MNC: Maximum Neighborhood Component; DMNC: Density of maximum neighborhood component; MCC: Maximal Clique Centrality.

**Table S6** The top five target genes of TF-target regulatory network.

| Target Genes | Degree* | TF    |
|--------------|---------|-------|
| PPARA        | 9       | RELA  |
| ITGB1        | 6       | FOXF2 |
| IGF2BP2      | 3       | HMGA2 |
| MBP          | 3       | SOX10 |
| REPS2        | 2       | NFKB1 |

Abbreviations: TF: transcription factor. \*Degree is a algorithm to assess the importance of genes in TF-target regulatory network.

**Table S7** The top five target genes of miRNA-target regulatory network.

| Target Genes | Degree* | MicroRNA       |
|--------------|---------|----------------|
| QKI          | 45      | hsa-mir-16-5p  |
| HIPK2        | 39      | hsa-mir-124-3p |
| KMT2A        | 33      | hsa-mir-155-5p |
| WASL         | 32      | hsa-mir-1-3p   |
| IL6ST        | 31      | hsa-mir-23b-3p |

\*Degree is a algorithm to assess the importance of genes in TF-target regulatory network.

**Table S8** Gene symbol of 171 DEGs from AD-related datasets.

|                                                                                                                                  |                          |                        |                     |                |             |
|----------------------------------------------------------------------------------------------------------------------------------|--------------------------|------------------------|---------------------|----------------|-------------|
| Gene symbol                                                                                                                      | Gene symbol              | Gene symbol            | Gene symbol         | Gene symbol    | Gene symbol |
| CCNY                                                                                                                             | SEZ6L                    | HIPK2                  | AP1S1               | LIMD1          | LRIG1       |
| CDH8                                                                                                                             | GABRG2                   | PCDH7                  | DYNC1H1             | COG1           | DOCK6       |
| ITSN1                                                                                                                            | SYNPO2                   | BCAP29                 | PITHD1              | ABHD12         | DOCK1       |
| SNCA                                                                                                                             | HIF3A                    | FRMPD4                 | TMED5               | KCNQ5          | TMEM178B    |
| ACSS3                                                                                                                            | GUCY1B3                  | REPS2                  | TNRC6C              | SOX9           | SLC22A23    |
| NLGN4X                                                                                                                           | RALGAPA2                 | TUSC3                  | CECR6               | DLGAP1         | DKK3        |
| AKT2                                                                                                                             | CADPS                    | PREPL                  | ST3GAL3             | POU3F2         | SEC16B      |
| ANKRD36                                                                                                                          | SLC17A7                  | RHEB                   | C17orf51            | FOXP2          | CADM2       |
| MED31                                                                                                                            | EMX1                     | SOBP                   | ZNRF1               | ELFN2          | DCLK1       |
| RGS12                                                                                                                            | IKZF2                    | MOCS2                  | DCAF8               | KIAA0513       | ARL10       |
| MBP                                                                                                                              | CYGB                     | WASL                   | GNAS                | CDK13          | LMBRD2      |
| CHRM3                                                                                                                            | HNRNPM                   | TTBK2                  | FRYL                | RHOJ           | PPARA       |
| KAZN                                                                                                                             | CEP152                   | LGALS1                 | ITGB1               | CTTN           | ST8SIA3     |
| AMBRA1                                                                                                                           | BCAT1                    | ANKRD50                | RUNX1T1             | FABP3          | UNC13C      |
| RAPH1                                                                                                                            | NPAS3                    | METTL7A                | PCSK2               | WWC1           | KIAA0754    |
| ARMC8                                                                                                                            | PRKCA                    | SMARCA2                | GREM2               | AGK            | ITGB8       |
| MAPRE3                                                                                                                           | GRIN1                    | DIRAS1                 | LRRC8B              | PIEZO1         | IGF2BP2     |
| DENND5B                                                                                                                          | EPB41L4B                 | RPS6KA5                | UNC80               | LATS2          | ANKH        |
| FGF14                                                                                                                            | SLC3A1                   | TPM3                   | RAB1A               | IQCA1          | GART        |
| CSRNP3                                                                                                                           | NFE2L2                   | PTPN5                  | DNAL1               | ZKSCAN8        | DLL3        |
| B3GALNT1                                                                                                                         | ZNF709                   | QKI                    | ANK2                | PMP2           | ATP6V1H     |
| RREB1                                                                                                                            | ATP2B2                   | AHI1                   | CEBPZOS             | MSI2           | CDC42EP4    |
| EPHA6                                                                                                                            | NUB1                     | KCNK10                 | ZNF224              | IL6ST          | TIMM50      |
| WNT2B                                                                                                                            | NRXN1                    | ICA1L                  | TLL2                | ZNF800         | ITGB5       |
| GIPC3                                                                                                                            | UBE2QL1                  | MAGI1                  | PXDC1               | ADAM22         | MEG3        |
| KITLG                                                                                                                            | SYN2                     | DPP6                   | PLCB1               | SCN2B          | NDUFA10     |
| CCDC88A                                                                                                                          | ARPP21                   | CACNA1C                | PRKG1               | CNOT6L         | FMNL2       |
| GABRB3                                                                                                                           | KMT2A                    | LOC101930370           |                     | PET117///KAT14 |             |
| MIR4683///FZ<br>D8                                                                                                               | LOC10050671<br>8///FLRT2 | LINC00461///<br>MIR9-2 | TUBA3D///T<br>UBA3C | /              | /           |
| LOC101930404///SNORD116-28///SNORD115-26///SNORD115-13///SNORD115-7///SNORD116-22///SNORD116-4///PWARSN///SNORD107///SNRPN///IPW |                          |                        |                     |                |             |

**Table S9** Gene symbol of 79 DEGs from AD and MDD.

| Gene symbol                                                                                                                     | Gene symbol | Gene symbol | Gene symbol | Gene symbol |
|---------------------------------------------------------------------------------------------------------------------------------|-------------|-------------|-------------|-------------|
| TPM3                                                                                                                            | DCAF8       | TIMM50      | KIAA0513    | ITGB1       |
| SOBP                                                                                                                            | CCNY        | TTBK2       | ARMC8       | PPARA       |
| LGALS1                                                                                                                          | RHEB        | GNAS        | CEBPZOS     | MOCS2       |
| TMED5                                                                                                                           | CDK13       | FRYL        | PLCB1       | SLC22A23    |
| MED31                                                                                                                           | SMARCA2     | DPP6        | CTTN        | ZNF800      |
| DNAL1                                                                                                                           | RUNX1T1     | RREB1       | NPAS3       | QKI         |
| ADAM22                                                                                                                          | RGS12       | TNRC6C      | PRKCA       | IL6ST       |
| CDC42EP4                                                                                                                        | BCAP29      | SLC3A1      | ITGB5       | MBP         |
| WASL                                                                                                                            | ZNF224      | KMT2A       | KCNQ5       | DYNC1H1     |
| SNCA                                                                                                                            | CCDC88A     | REPS2       | ANKH        | ABHD12      |
| CECR6                                                                                                                           | CNOT6L      | METTL7A     | AGK         | PIEZO1      |
| PITHD1                                                                                                                          | NFE2L2      | ZNRF1       | ANKRD36     | KAZN        |
| LRIG1                                                                                                                           | GUCY1B3     | CEP152      | GART        | HIPK2       |
| HNRNPM                                                                                                                          | ITSN1       | LIMD1       | LATS2       | WWC1        |
| KIAA0754                                                                                                                        | AMBRA1      | IGF2BP2     | MAPRE3      | NDUFA10     |
| LOC100506718                                                                                                                    | FLRT2       | PET117      | KAT14       | /           |
| LOC101930404///SNORD116-28///SNORD115-26///SNORD115-13///SNORD115-7///SNORD116-22///SNORD116-4///PWARN///SNORD107///SNRPN///IPW |             |             |             |             |
